# Supplementary material
Source: PubMed Central journal article supplement (PMC2739827)
Supplement: 90446.2008_1.pdf [file 90446.2008_1.pdf]

# Supplemental Figure 1

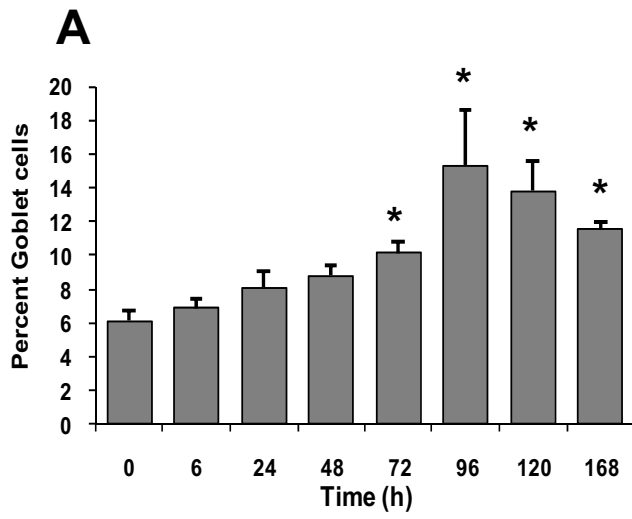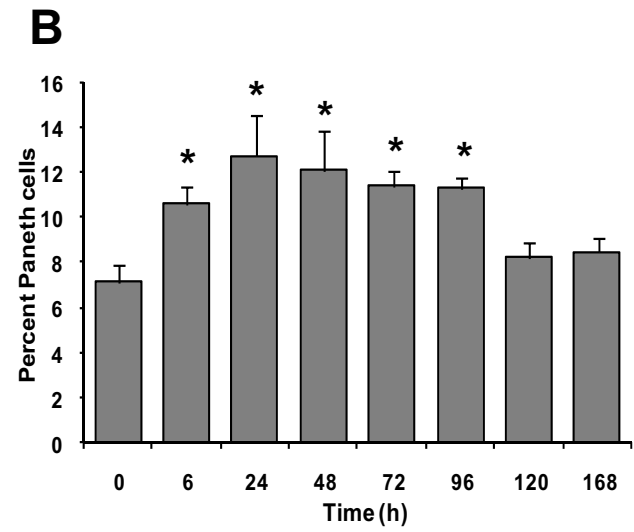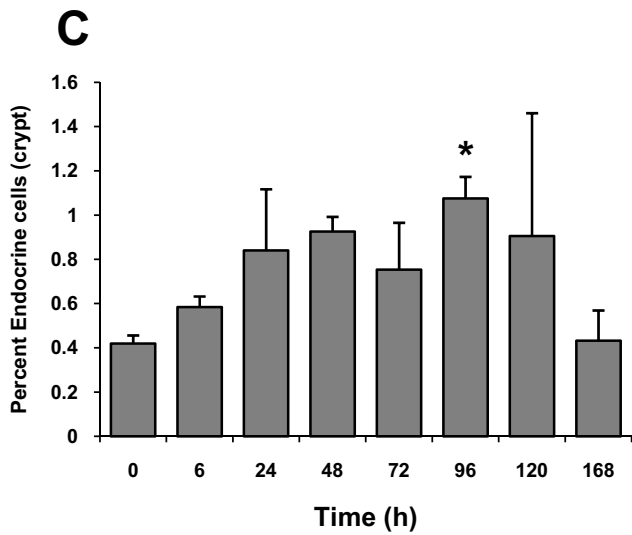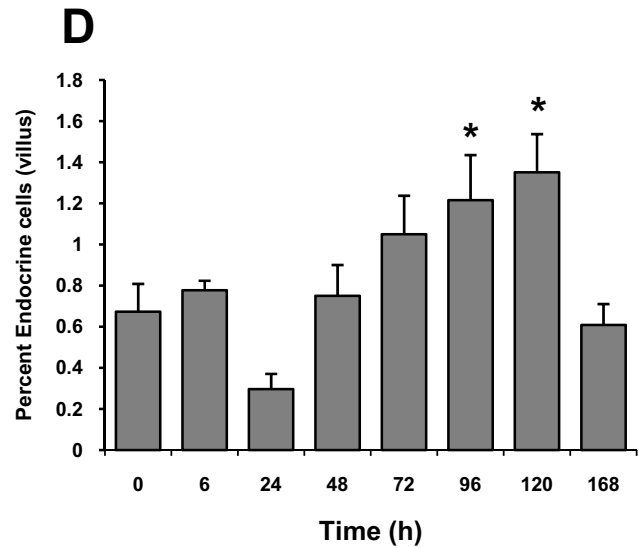

**Supplemental Figure 1.** DOX treatment alters percentage of lineage allocation. The percentages of goblet, Paneth, and enteroendocrine cells within epithelium were quantified at 0, 6, 24, 48, 72, 96, 120, and 168h after DOX treatment. A) goblet cells per half villus, B) Paneth cells per crypt, C) enteroendocrine cells per crypt, and D) enteroendocrine cells per villus. Statistical significance as compared to controls ( $P < 0.05$ ) is indicated by an asterisk (n=5-6 for goblet and Paneth cell data; n=3 for enteroendocrine cell data).
